# Supplementary material for: Transmission Potential of Floridian Aedes aegypti Mosquitoes for Dengue Virus Serotype 4: Implications for Estimating Local Dengue Risk
Source: PubMed Central journal article supplement (PMC8386419; doi:10.1128/msphere.00271-21), 2021-07-07

**A**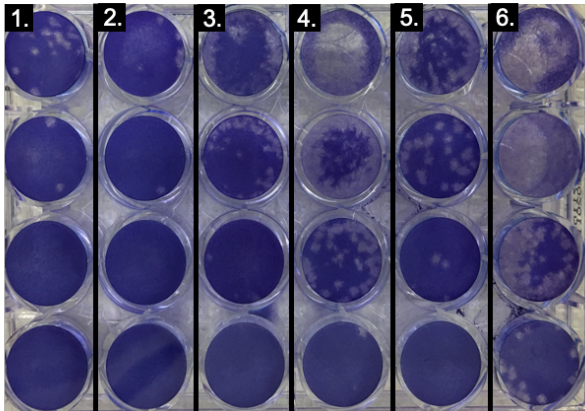**B**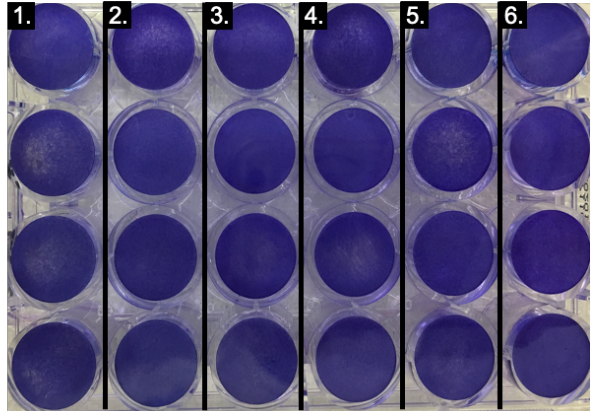

Supplement: msphere.00271-21-sf001.pdf [file msphere.00271-21-sf001.pdf]
